# Supplementary material
Source: publisher site journal article supplement (https://www.dovepress.com/article/527528)

**Supplementary File 1.** Sequences of oligonucleotides

| Gene                                        | Sequences (5'-3')                                                    |
|---------------------------------------------|----------------------------------------------------------------------|
| <i>lncTAF15:1-1-forward</i>                 | TTTGCTCACT GGACGAGTAG                                                |
| <i>lncTAF15:1-1-reverse</i>                 | AGATGGTTTGATTTTCTTCTCC                                               |
| <i>CCL5-forward</i>                         | CCAGCAGTCGTCTTTGTCAC                                                 |
| <i>CCL5-reverse</i>                         | CTCTGGGTTGGCACACACTT                                                 |
| <i>ACTB-forward</i>                         | AAGGTGACAGCAGTCGGTT                                                  |
| <i>ACTB-reverse</i>                         | TGTGTGGACTTGGGAGAGG                                                  |
| <i>GAPDH-forward</i>                        | GGGAAGGTGAAGGTCGGAGT                                                 |
| <i>GAPDH-reverse</i>                        | GGGGTCATTGATGGCAACA                                                  |
| <i>lncTAF15:1-1-siRNA targeted sequence</i> | GGACTTGAGCTAGTCACTTT<br>TTCAGTTTGCTCACTGGACG<br>GTTTGCTCACTGGACGAGTA |
| <i>lncTAF15:1-1-Aso targeted sequence</i>   | GGACTTGAGCTAGTCACTT<br>GAGCTTCAGTTTGCTCACT<br>GAGTAGGAAAGTCATTCT     |

ASO: antisense oligonucleotides; siRNA: small interfering RNA.

**Supplementary File 2.** List of differentially expressed genes in *IncTAF15:1-1* overexpressed

moDC groups compared to vector groups

| Gene     | logFC    | P.Value  |
|----------|----------|----------|
| AAMP     | 1.808538 | 0.008721 |
| ABCC3    | 2.18152  | 0.044793 |
| ABHD3    | 1.217884 | 0.012637 |
| ABHD8    | 1.269212 | 0.002908 |
| ABTB1    | 1.180358 | 0.024065 |
| ABTB2    | -5.11    | 0.001029 |
| ACAP1    | 1.236062 | 0.00206  |
| ACO1     | -1.11787 | 0.01938  |
| ACP2     | 7.21738  | 0.029642 |
| ACTR3    | -6.1944  | 0.000463 |
| ADAM19   | -1.35005 | 0.003559 |
| ADCY3    | 1.621198 | 0.042168 |
| ADCY7    | 5.2924   | 0.001329 |
| ADGRB1   | 2.151322 | 9.06E-05 |
| ADGRE5   | 2.44762  | 0.002336 |
| ADIPOR1  | 2.8174   | 0.021077 |
| ADPGK    | -2.07398 | 0.006417 |
| AGTRAP   | 3.18906  | 0.021291 |
| ALAS1    | 15.0602  | 0.031197 |
| ALDH1A2  | 3.38046  | 0.001417 |
| ALDH9A1  | 1.161952 | 0.043921 |
| AMPD3    | 2.85594  | 0.021611 |
| ANKRD33B | -2.19006 | 0.040597 |
| ANPEP    | 27.3424  | 0.016276 |
| ANTXR2   | -2.30888 | 0.039679 |
| AP1S2    | -1.19148 | 0.034405 |
| AP5B1    | 2.5335   | 0.043488 |
| APIP     | -1.22178 | 0.03372  |
| APP      | 6.63484  | 0.012215 |
| ARHGAP30 | 3.8911   | 0.023537 |
| ARHGAP4  | 1.16634  | 0.005373 |
| ARHGEF11 | -2.6998  | 0.004642 |
| ARID5B   | -1.13907 | 0.043986 |
| ARL15    | 1.105084 | 0.00152  |
| ATG3     | 1.65472  | 0.031424 |
| ATP1A1   | 2.94316  | 0.020479 |
| ATP2B1   | -3.4669  | 0.043642 |
| ATP6V1A  | 5.91468  | 0.043472 |
| ATP6V1B2 | 13.8348  | 0.009263 |

|          |          |          |
|----------|----------|----------|
| ATP8B2   | 1.039724 | 0.032173 |
| ATXN2L   | -1.5573  | 0.047889 |
| BAALC    | 1.334674 | 0.002476 |
| BAK1     | 5.1841   | 0.034229 |
| BATF2    | 2.173    | 0.036828 |
| BCKDK    | 2.72264  | 0.033003 |
| BCL2A1   | -97.3002 | 0.007766 |
| BCL2L14  | -4.52032 | 9.05E-05 |
| BCL9L    | -1.12405 | 0.043145 |
| BEX4     | 2.807032 | 0.014888 |
| BIRC3    | -35.5552 | 0.020406 |
| BLCAP    | 1.503282 | 0.002519 |
| BPGM     | 1.510696 | 0.038448 |
| BTG1     | -5.99454 | 0.017645 |
| BTG3     | -2.8691  | 0.038317 |
| BTK      | 1.64406  | 0.024067 |
| C18orf32 | -2.28474 | 0.021946 |
| C19orf38 | 2.614596 | 0.025815 |
| C1orf54  | 4.46326  | 0.008802 |
| C1QA     | 5.038138 | 0.004109 |
| C1QB     | 8.9924   | 0.016897 |
| C1QC     | 8.2174   | 0.020851 |
| C3       | 2.542498 | 0.045752 |
| C5AR1    | 10.51698 | 0.014875 |
| CA2      | 7.77348  | 0.046247 |
| CALM1    | 4.91452  | 0.028518 |
| CANX     | 5.98364  | 0.037147 |
| CAPN2    | 4.81844  | 0.000274 |
| CAPZA1   | -6.0894  | 0.033636 |
| CASP1    | 3.64652  | 0.041538 |
| CAVIN1   | 1.481442 | 0.030362 |
| CCDC69   | 1.07708  | 0.013551 |
| CCL20    | -185.987 | 0.018648 |
| CCR1     | 9.09826  | 0.002425 |
| CCT3     | 1.88836  | 0.014841 |
| CCT6A    | 2.12724  | 0.018992 |
| CD209    | 2.44732  | 0.039536 |
| CD276    | 8.61254  | 0.025788 |
| CD300LF  | 1.070786 | 0.038299 |
| CD36     | 1.176547 | 0.009517 |
| CD4      | 1.436074 | 0.002378 |
| CD44     | -21.2174 | 0.013844 |
| CD46     | -4.47586 | 0.041072 |
| CD59     | 1.35475  | 0.018411 |

|          |          |          |
|----------|----------|----------|
| CDC42SE1 | -4.5184  | 0.020134 |
| CDK7     | -1.04046 | 0.035073 |
| CDS2     | 1.03923  | 0.012041 |
| CEBPB    | 49.488   | 0.042267 |
| CELF2    | -3.59204 | 0.023853 |
| CEP135   | -1.81779 | 0.002209 |
| CEPT1    | 1.097076 | 0.001535 |
| CHST11   | 4.58496  | 0.000434 |
| CIR1     | 3.52368  | 0.044965 |
| CKLF     | 1.304898 | 0.033284 |
| CLCF1    | -6.48842 | 0.024389 |
| CLEC2D   | -2.82212 | 0.01361  |
| CLINT1   | -4.8471  | 0.014705 |
| CLN3     | 1.93894  | 0.02877  |
| CLN5     | 1.711318 | 0.007405 |
| CMC2     | 1.427168 | 0.015949 |
| COMMD5   | 1.280318 | 0.007536 |
| CORO1C   | 3.2077   | 0.000802 |
| COX7B    | 11.1036  | 0.038875 |
| CS       | -1.13304 | 0.034809 |
| CSF1R    | 6.028334 | 0.020781 |
| CTNNA1   | -6.58264 | 0.025893 |
| CTNNB1   | -21.0912 | 0.023873 |
| CTSL     | 31.05418 | 0.016238 |
| CUEDC1   | 1.867722 | 0.005038 |
| CUL1     | -2.28718 | 0.036408 |
| CXCL11   | -353.702 | 0.032401 |
| CXCR4    | 1.549912 | 0.009699 |
| CXCR5    | -1.84551 | 0.024691 |
| CYB5R4   | 4.04248  | 0.037329 |
| CYP2S1   | 1.1241   | 0.000474 |
| CYTH4    | 3.963024 | 0.004126 |
| DAB2     | 1.947652 | 0.003962 |
| DAGLA    | 1.644318 | 0.006281 |
| DAPP1    | -2.10004 | 0.036142 |
| DCTD     | 1.28542  | 0.009427 |
| DCTN4    | -1.2966  | 0.026024 |
| DCTN6    | -1.3698  | 0.048429 |
| DCUN1D3  | 1.451586 | 0.010065 |
| DDB2     | 1.518942 | 0.000931 |
| DDIT3    | 1.592334 | 0.029095 |
| DENND5A  | -11.0685 | 0.009191 |
| DHX15    | -1.66812 | 0.04278  |
| DLAT     | -1.1603  | 0.034064 |

|          |          |          |
|----------|----------|----------|
| DLD      | -1.78416 | 0.013673 |
| DNAJA4   | 1.14289  | 0.014473 |
| DNAJB1   | 5.106696 | 0.023733 |
| DUSP23   | 1.023818 | 0.041793 |
| DUSP3    | 1.51646  | 0.001532 |
| DUSP5    | -16.089  | 0.021517 |
| DVL3     | -1.33694 | 0.044589 |
| EDN1     | -1.51182 | 0.003782 |
| EEF1A1   | -27.668  | 0.020015 |
| EHD4     | -5.27192 | 0.028557 |
| EIF2S3   | 1.14112  | 0.048342 |
| EIF4E3   | 1.603066 | 0.001744 |
| EIF4G1   | -1.77402 | 0.042309 |
| ELOVL5   | -5.6161  | 0.003881 |
| EMP1     | 16.14432 | 0.000778 |
| ENG      | 2.69848  | 0.013343 |
| ERG28    | -1.18751 | 0.035247 |
| EVI2B    | 3.82414  | 0.007635 |
| EWSR1    | -1.71318 | 0.03297  |
| EXOSC9   | -3.22066 | 0.016023 |
| FAM129B  | 7.7339   | 0.008023 |
| FAM177A1 | -4.01932 | 0.002766 |
| FAM241A  | -1.6568  | 0.03973  |
| FAM3C    | 1.73693  | 0.03122  |
| FAM49A   | -1.93484 | 0.041364 |
| FAM8A1   | 1.484672 | 0.000434 |
| FBP1     | 7.31914  | 0.035349 |
| FDX1     | 2.133934 | 0.016024 |
| FFAR2    | -1.85626 | 0.025727 |
| FGL2     | 9.49924  | 0.010591 |
| FGR      | 7.31788  | 0.04587  |
| FKBP15   | 2.43532  | 0.011716 |
| FKBP4    | 2.435876 | 0.001272 |
| FLOT1    | -2.60272 | 0.022783 |
| FNBP1    | -3.63062 | 0.003266 |
| FPR3     | 32.5472  | 0.000174 |
| FUCA2    | 3.02602  | 0.030027 |
| FURIN    | 4.47406  | 0.027548 |
| G3BP1    | 3.75442  | 0.007249 |
| GALNT6   | 1.231274 | 0.000524 |
| GBGT1    | 1.187876 | 0.024251 |
| GBP1     | -48.6262 | 0.006852 |
| GCH1     | -23.0444 | 0.008884 |
| GDE1     | 1.930186 | 0.00907  |

|           |          |          |
|-----------|----------|----------|
| GIMAP2    | 2.27088  | 0.047895 |
| GLA       | 4.259    | 0.021763 |
| GLIPR1    | 3.34482  | 0.011011 |
| GLMP      | 2.970386 | 0.005409 |
| GLRX      | 5.00892  | 0.01874  |
| GLRX5     | 1.364582 | 0.029132 |
| GLUL      | 5.06004  | 0.017494 |
| GNPDA1    | 1.101314 | 0.016083 |
| GPAT3     | 1.337568 | 0.017729 |
| GPR108    | 1.210796 | 0.041448 |
| GPR35     | 4.93158  | 0.043742 |
| GYG1      | 1.77186  | 0.039242 |
| H2AFZ     | 4.86676  | 0.001758 |
| H6PD      | -2.58228 | 0.029876 |
| HAVCR2    | 10.1603  | 0.011034 |
| HINT3     | 1.12398  | 0.043109 |
| HIRA      | 1.56036  | 0.037205 |
| HIST1H2BD | 2.860862 | 0.021391 |
| HK3       | 11.20554 | 0.027727 |
| HLA-DRA   | 205.044  | 0.021749 |
| HMOX1     | 12.74666 | 0.040635 |
| HNRNPK    | -4.3146  | 0.005505 |
| HNRNPU    | -2.33112 | 0.001824 |
| HSD17B11  | 3.11888  | 0.002635 |
| HSD17B12  | 1.94578  | 0.032341 |
| HSP90AA1  | 20.8962  | 0.011643 |
| HSP90AB1  | 23.38056 | 0.004926 |
| HSPA4     | 1.77776  | 0.023256 |
| HSPA8     | 81.2812  | 0.008634 |
| HSPB1     | 12.85732 | 0.038137 |
| HSPD1     | 8.4967   | 0.00683  |
| HSPE1     | 7.8164   | 0.024472 |
| HSPH1     | 8.59722  | 0.004416 |
| IDO2      | -1.10923 | 0.009693 |
| IFIT1     | 22.078   | 0.020601 |
| IFNAR2    | 2.0869   | 0.010833 |
| IGFBP4    | -54.146  | 0.017667 |
| IGSF6     | 40.9824  | 0.027466 |
| IL10RB    | 2.50082  | 0.044927 |
| IL12A     | -8.5532  | 0.000409 |
| IL12B     | -110.501 | 0.001125 |
| IL18      | -10.853  | 0.026386 |
| IL1RN     | 143.3264 | 0.002265 |
| IL27      | -23.4518 | 0.016499 |

|           |          |          |
|-----------|----------|----------|
| IL27RA    | 2.347416 | 0.010653 |
| IL6R      | 2.99294  | 0.009336 |
| INPP5D    | 1.604744 | 0.048628 |
| IRAK1     | 7.73172  | 0.005167 |
| IRF2BPL   | 1.038284 | 0.049421 |
| IRF4      | -8.89484 | 0.013666 |
| IRF8      | -50.2198 | 0.004036 |
| ITGA5     | 5.59706  | 0.041309 |
| ITGAL     | 2.375654 | 0.045139 |
| ITGAM     | 8.43312  | 0.014595 |
| ITGAX     | 15.75904 | 0.025406 |
| ITGB7     | 3.098366 | 0.02057  |
| ITPRIPL2  | -4.74346 | 0.03221  |
| JUP       | 2.696644 | 0.036739 |
| KCNAB2    | 1.277036 | 0.046378 |
| KLF9      | 1.02303  | 0.028766 |
| KPNA2     | 1.69526  | 0.005298 |
| KYNU      | -7.613   | 0.019069 |
| LAPTM5    | 40.2234  | 0.010462 |
| LHFPL2    | 4.7433   | 0.00317  |
| LILRA2    | 1.677138 | 0.024203 |
| LILRA6    | 4.63324  | 0.014392 |
| LILRB1    | 6.81036  | 0.025836 |
| LILRB4    | 9.872    | 0.031336 |
| LIMK1     | 5.04954  | 0.039885 |
| LMO2      | 1.927978 | 0.027827 |
| LOC388813 | -3.12554 | 0.007882 |
| LPCAT2    | 2.94518  | 0.013717 |
| LPGAT1    | -1.45254 | 0.003808 |
| LPIN2     | -2.65564 | 0.035424 |
| LRRC8D    | 1.06392  | 0.012837 |
| LSM10     | 3.62796  | 0.001823 |
| LUC7L2    | 1.46734  | 0.048233 |
| LYSMD2    | 1.882248 | 0.019369 |
| LYZ       | 136.428  | 0.000145 |
| M6PR      | 5.42264  | 0.001033 |
| MAN1A1    | -3.3536  | 0.004606 |
| MAP3K8    | -6.8849  | 0.013572 |
| MARCKS    | -29.3556 | 0.001088 |
| MAX       | 2.64606  | 0.038226 |
| MBOAT7    | 2.333702 | 0.029343 |
| MDM2      | 2.89552  | 0.019483 |
| ME2       | 2.4638   | 0.026046 |
| MED15     | -1.09    | 0.035663 |

|         |          |          |
|---------|----------|----------|
| MESD    | 2.15214  | 0.019281 |
| METTL9  | -3.0584  | 0.032841 |
| MFSD6   | -1.18538 | 0.0244   |
| MGRN1   | -1.48662 | 0.008332 |
| MGST1   | 2.20504  | 0.028094 |
| MINPP1  | 1.347956 | 0.018038 |
| MKNK2   | 1.728226 | 0.012631 |
| MMP19   | 1.380168 | 0.00205  |
| MPP1    | 2.88138  | 0.046995 |
| MRC1    | 12.62098 | 0.009772 |
| MRC2    | 1.489472 | 0.012906 |
| MRPL12  | 2.165332 | 0.038045 |
| MRPL15  | 1.272404 | 0.035311 |
| MRPL34  | 2.46817  | 0.046846 |
| MRPL44  | 1.58748  | 0.001168 |
| MS4A4A  | 1.473522 | 0.037459 |
| MSANTD3 | 2.99666  | 0.006817 |
| MUC1    | -3.11282 | 0.041499 |
| MUL1    | 1.037126 | 0.019865 |
| MYADM   | -4.4067  | 0.016344 |
| MYH9    | -4.86132 | 0.007821 |
| MYO18A  | 1.600722 | 0.015213 |
| MYO1E   | 1.97237  | 0.011288 |
| MYO1G   | -8.18226 | 0.028497 |
| MZT1    | -1.24095 | 0.018606 |
| N4BP2L1 | -1.88208 | 0.02475  |
| NAA50   | 1.40592  | 0.027144 |
| NARS    | 2.21158  | 0.006727 |
| NCF2    | 19.83888 | 0.002981 |
| NCF4    | 1.503996 | 0.014288 |
| NDUFA8  | 1.044444 | 0.046568 |
| NDUFB5  | 2.41822  | 0.026859 |
| NFKB1   | -13.536  | 0.036804 |
| NFKB2   | -7.34644 | 0.042059 |
| NIPA2   | 1.31164  | 0.037539 |
| NPC1    | 2.45962  | 0.011186 |
| NR1H3   | 6.561792 | 0.007596 |
| NR4A3   | -24.0262 | 0.022507 |
| NREP    | -1.9866  | 0.031698 |
| NRIP3   | 1.969214 | 0.002776 |
| NRP1    | 1.959846 | 0.000122 |
| NRROS   | 4.83748  | 0.004091 |
| NSUN2   | 1.15962  | 0.022768 |
| NT5C2   | 1.1302   | 0.008271 |

|          |          |          |
|----------|----------|----------|
| NUDT22   | 1.207774 | 0.029691 |
| ODC1     | 1.6257   | 0.003693 |
| OGDH     | 2.8063   | 0.037173 |
| OPN3     | 3.76366  | 0.003226 |
| OSGIN1   | 1.745838 | 0.035999 |
| OSTM1    | 1.51984  | 0.00901  |
| P2RY11   | 2.366824 | 0.019699 |
| PABPC1   | -11.5792 | 0.03263  |
| PAPSS1   | 1.63017  | 0.010864 |
| PCNA     | 2.126878 | 0.021526 |
| PDCD1LG2 | 1.502822 | 0.001514 |
| PDE4B    | -5.28482 | 0.045763 |
| PDXK     | 1.79378  | 0.034931 |
| PECAM1   | 3.3035   | 0.010284 |
| PFDN1    | 1.3205   | 0.010049 |
| PHLDA3   | 1.164734 | 0.014215 |
| PIK3CD   | -2.60406 | 0.001466 |
| PIK3R5   | -2.31888 | 0.012919 |
| PILRA    | 14.72446 | 0.016496 |
| PIP5K1A  | -1.04054 | 0.005805 |
| PLA1A    | -1.0217  | 0.037335 |
| PLA2G15  | 1.39625  | 0.003187 |
| PLA2G4C  | 1.178814 | 0.000642 |
| PLEKHB2  | 2.65844  | 0.023203 |
| PLEKHM2  | 2.7378   | 0.038844 |
| PLXNB2   | 1.880942 | 0.014264 |
| PNP      | 2.21485  | 0.031448 |
| PNPT1    | -1.4911  | 0.025259 |
| POGLUT1  | -1.0957  | 0.005366 |
| POLR3K   | 1.49621  | 0.038978 |
| PPA1     | -5.28378 | 0.032541 |
| PPA2     | 1.209048 | 0.031174 |
| PPM1G    | 1.2538   | 0.024493 |
| PPM1M    | 1.860192 | 0.020423 |
| PPP2R5C  | 1.215688 | 0.023355 |
| PRDM4    | 1.003704 | 0.023996 |
| PRNP     | 4.63534  | 0.000634 |
| PRPF3    | -3.11206 | 0.010782 |
| PSMC5    | 1.7836   | 0.006747 |
| PSMD9    | 1.158852 | 0.02728  |
| PSTPIP2  | -10.1097 | 0.011221 |
| PTAFR    | 7.51678  | 0.001314 |
| PTGER2   | 3.27382  | 0.047693 |
| PTPN6    | 8.99038  | 0.02036  |

|          |          |          |
|----------|----------|----------|
| PTPRE    | 1.40052  | 0.036808 |
| QDPR     | 1.019644 | 0.039962 |
| QPCT     | 8.12554  | 0.019702 |
| RAB24    | 3.049718 | 0.010592 |
| RAB29    | -7.5325  | 0.001457 |
| RAB2B    | -1.42954 | 0.004852 |
| RAB5A    | -5.63888 | 0.00036  |
| RAC2     | 19.16022 | 0.002509 |
| RAP1GDS1 | 1.007724 | 0.009726 |
| RAP2C    | -6.58502 | 0.006741 |
| RARS     | 1.372    | 0.011492 |
| RASA3    | 1.020282 | 0.004731 |
| RASGEF1B | 2.5695   | 0.0424   |
| RFK      | 1.71144  | 0.011368 |
| RGCC     | 9.237528 | 0.043218 |
| RHBDF2   | 2.10758  | 0.011337 |
| RIN2     | 2.053652 | 0.026452 |
| RIT1     | 2.10806  | 0.008278 |
| RMC1     | 1.39538  | 0.009311 |
| RNASE6   | 2.329678 | 0.002391 |
| RNF13    | 3.09624  | 0.017527 |
| RNF149   | 1.647074 | 0.044379 |
| RPP25    | 1.121132 | 0.018896 |
| RPS27L   | 2.5405   | 0.033951 |
| RRAGC    | -2.30736 | 0.042329 |
| RSAD2    | 160.9676 | 0.022334 |
| RSL24D1  | 1.9015   | 0.022863 |
| S100A4   | 10.50158 | 0.033792 |
| SAMSN1   | -10.6811 | 0.002819 |
| SDC4     | -13.5492 | 0.033349 |
| SDCBP    | 6.393    | 0.016491 |
| SDHB     | 3.34032  | 0.014216 |
| SELENOF  | 2.7655   | 0.026615 |
| SEP11    | -2.28164 | 0.016184 |
| SERP1    | 2.29216  | 0.001765 |
| SERPINB1 | -7.90926 | 0.003763 |
| SERPINB9 | -22.9066 | 0.000838 |
| SERPINH1 | 1.914026 | 0.02003  |
| SFPQ     | -1.40766 | 0.038554 |
| SFT2D1   | 2.63498  | 0.045874 |
| SFXN3    | 1.988182 | 0.023961 |
| SGPP1    | 1.23308  | 0.047714 |
| SGPP2    | -3.4105  | 0.002827 |
| SGTB     | 1.914128 | 0.015152 |

|          |          |          |
|----------|----------|----------|
| SH2B3    | -2.2782  | 0.009972 |
| SH3BP5   | 1.267172 | 0.002444 |
| SIGLEC10 | 2.32406  | 0.006324 |
| SIGLEC7  | 2.166622 | 0.006924 |
| SIGMAR1  | 1.003    | 0.011132 |
| SINHCAF  | -4.09332 | 0.027911 |
| SLC11A2  | 1.4434   | 0.025684 |
| SLC17A5  | 3.92214  | 0.049441 |
| SLC1A2   | -1.90836 | 0.024589 |
| SLC20A1  | 1.106384 | 0.025768 |
| SLC26A11 | 3.460322 | 0.029835 |
| SLC30A5  | 1.116318 | 0.023011 |
| SLC30A9  | 1.101012 | 0.026734 |
| SLC31A2  | 1.52128  | 0.034695 |
| SLC35F6  | 1.143478 | 0.020798 |
| SLC37A2  | 2.509172 | 0.02888  |
| SLC38A2  | 4.47068  | 0.02439  |
| SLC3A2   | 21.18482 | 0.007914 |
| SLC43A3  | 10.3425  | 0.012819 |
| SLC7A7   | 19.61594 | 0.006808 |
| SLC7A8   | 5.629518 | 0.030329 |
| SLC8B1   | 1.37874  | 0.013519 |
| SMAP2    | -2.46194 | 0.030358 |
| SMARCD2  | 1.16224  | 0.015384 |
| SMIM14   | 1.068848 | 0.014474 |
| SMYD2    | 1.079958 | 0.046134 |
| SNX5     | 1.182294 | 0.028906 |
| SPG21    | 4.68974  | 0.002067 |
| SPP1     | 71.534   | 0.013084 |
| SPR      | 2.193186 | 0.023566 |
| SRGN     | -21.3668 | 0.015967 |
| SRSF3    | -2.26074 | 0.038658 |
| ST13     | 3.81928  | 0.015206 |
| STARD4   | -4.66008 | 0.018527 |
| STARD7   | 4.08004  | 0.013585 |
| STAT2    | -4.2008  | 0.001981 |
| STIP1    | 4.84304  | 0.01553  |
| STK17B   | -1.26378 | 0.016811 |
| STOM     | 5.6976   | 0.027121 |
| SUN2     | 2.38924  | 0.01238  |
| SYK      | 1.575104 | 0.001226 |
| TAGAP    | 1.578208 | 0.041929 |
| TBCA     | 1.01738  | 0.011231 |
| TCEAL8   | 1.470786 | 0.045998 |

|           |          |          |
|-----------|----------|----------|
| TCP1      | 2.9115   | 0.034015 |
| TEX261    | 1.15136  | 0.036166 |
| TFRC      | -17.2166 | 0.020128 |
| TGFB1     | 4.77774  | 0.038089 |
| TGFBI     | 7.0896   | 0.001205 |
| TIPARP    | -2.11198 | 0.021728 |
| TJP2      | -1.12146 | 0.025167 |
| TLR8      | 4.90438  | 0.04638  |
| TM4SF19   | 25.35826 | 0.039999 |
| TMEM109   | 2.10854  | 0.037455 |
| TMEM120A  | -1.26723 | 0.008058 |
| TMEM123   | -39.2326 | 0.021305 |
| TMEM140   | 11.83922 | 0.046681 |
| TMEM206   | 1.177994 | 0.023238 |
| TMEM251   | 4.696206 | 0.001415 |
| TMEM255A  | 1.24816  | 0.002243 |
| TNFAIP8L2 | 1.769344 | 0.012628 |
| TNFRSF21  | 1.17344  | 0.041192 |
| TNFSF14   | 1.135924 | 0.021016 |
| TNFSF15   | -7.72555 | 0.026789 |
| TNS3      | 2.77062  | 0.029808 |
| TOR3A     | 3.41238  | 0.021651 |
| TP53BP2   | -1.41936 | 0.017056 |
| TP53I3    | 1.501044 | 0.010002 |
| TPD52L2   | 3.44282  | 0.041571 |
| TRA2A     | -1.3499  | 0.03664  |
| TRAK2     | 1.029542 | 0.010955 |
| TRAM1     | 4.11706  | 0.018499 |
| TRIM47    | 1.256462 | 0.03215  |
| TRIP10    | -3.49018 | 0.044497 |
| TSNAX     | 1.29572  | 0.023232 |
| TSPAN3    | 4.78524  | 0.024018 |
| TTC39B    | 1.716164 | 0.021046 |
| TTYH3     | 8.27762  | 0.001242 |
| TUBA4A    | 1.194976 | 0.009686 |
| TWF2      | 5.51468  | 0.044642 |
| TXNIP     | 8.699    | 0.009994 |
| UAP1L1    | 1.033578 | 0.019036 |
| UBAC1     | 1.112386 | 0.019484 |
| UBE2Q1    | 1.60498  | 0.014185 |
| UNC119    | 1.020906 | 0.032479 |
| UNC50     | 1.84168  | 0.015935 |
| UQCRC2    | 1.21388  | 0.022398 |
| VMP1      | 4.56666  | 0.016996 |

|          |          |          |
|----------|----------|----------|
| VPS26A   | -1.51304 | 0.006355 |
| WSB2     | -2.21854 | 0.004691 |
| XAF1     | -3.18444 | 0.03878  |
| YWHAZ    | -3.3542  | 0.016071 |
| ZBTB7B   | 1.086672 | 0.028028 |
| ZCRB1    | 1.11576  | 0.009849 |
| ZDHHC7   | 1.13792  | 0.0337   |
| ZFAND5   | 2.44862  | 0.019957 |
| ZMPSTE24 | 1.96472  | 0.02747  |

---

**Supplementary File 3. Regulation of *IncTAF15:1-1* did not affect other functions of moDCs, including viability, surface markers expressions and inflammation-related cytokines mRNA levels.**

(A) The mRNA expression levels of a couple of inflammation-related cytokines in vector and overexpression group were measured and plotted.

(B) Viability of moDCs was assessed by CCK-8 assay at six time points after transfection and compared between blank, vector and overexpression groups.

(C-D) Both MFI values and positive cell percentages of surface markers CD11c, CD40, CD83, CD86 and HLA-DR were compared by flow cytometry.

(E) The CCR5 expressions were evaluated using flow cytometry between adeno-V vs. adno-OE, NC vs. SS.

P values for two sample comparisons were determined by t-test (two-tailed); two-way ANOVA was applied here for the viability curve comparisons. Data were from at least three independent experiments and shown as the mean  $\pm$  SEM. \* $p < 0.05$ , \*\* $p < 0.01$ , \*\*\* $p < 0.001$ , \*\*\*\* $p < 0.0001$ . ns, not significant; moDCs, monocyte-derived dendritic cells.

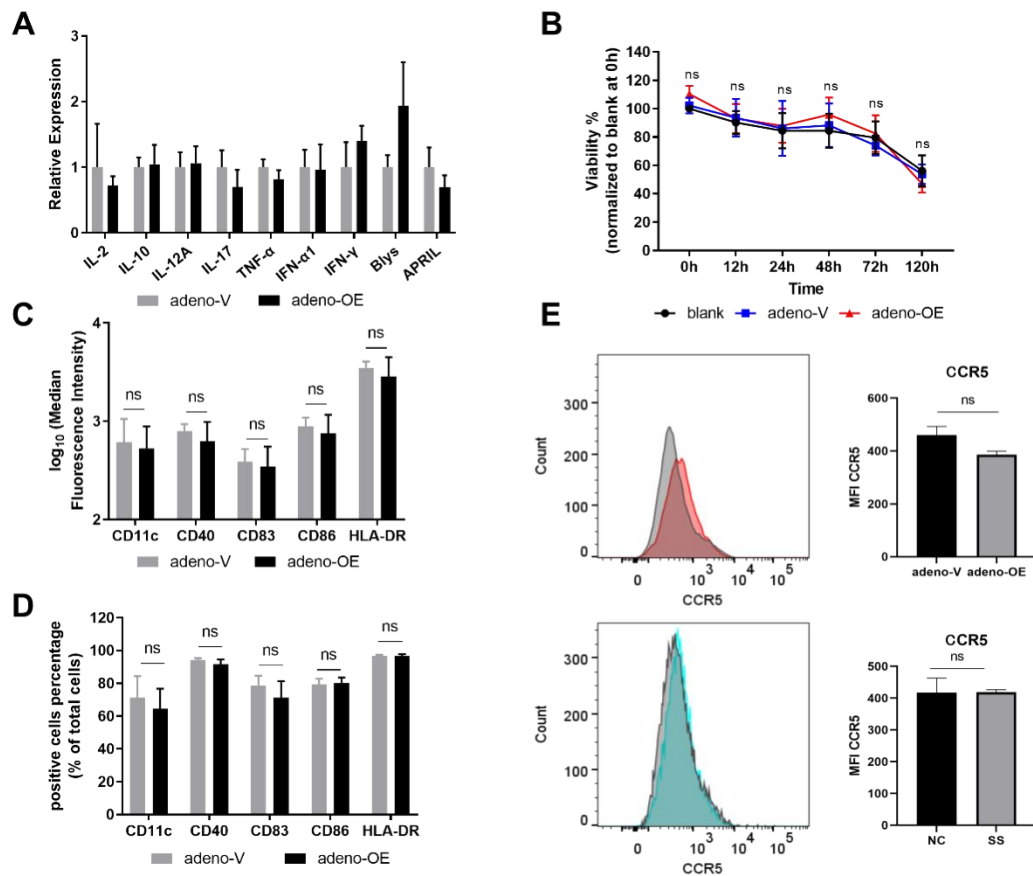

Supplement: Supplementary file 1 [file 527528%20Revised%20Supplementary%20Material.pdf]
